# Supplementary material
Source: MDPI journal article supplement (https://www.mdpi.com/2073-4433/12/7/827)
Supplement: s1 [file s1]

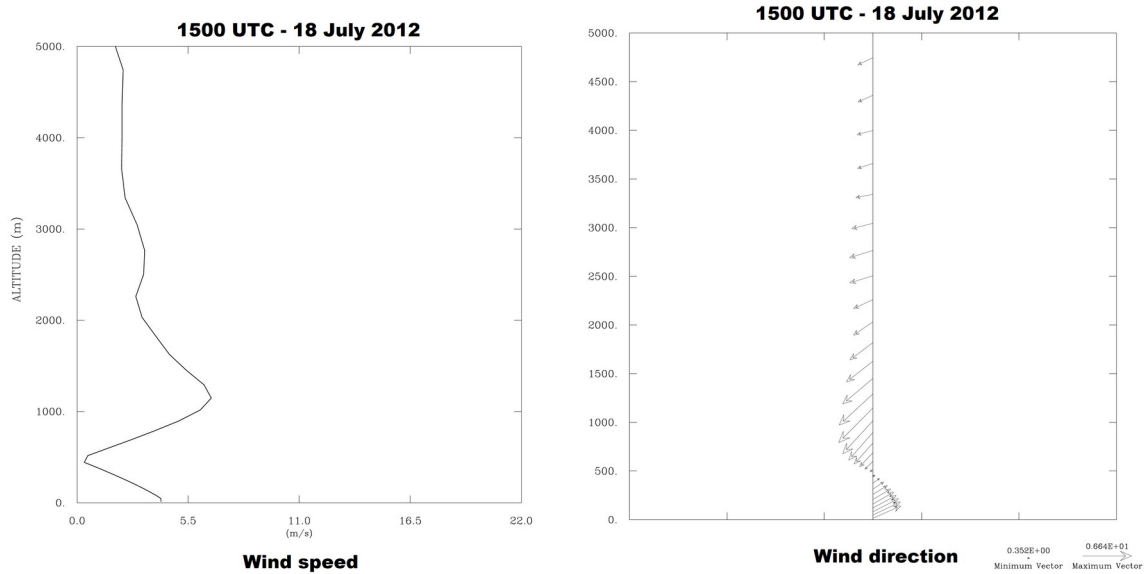

**(a)**

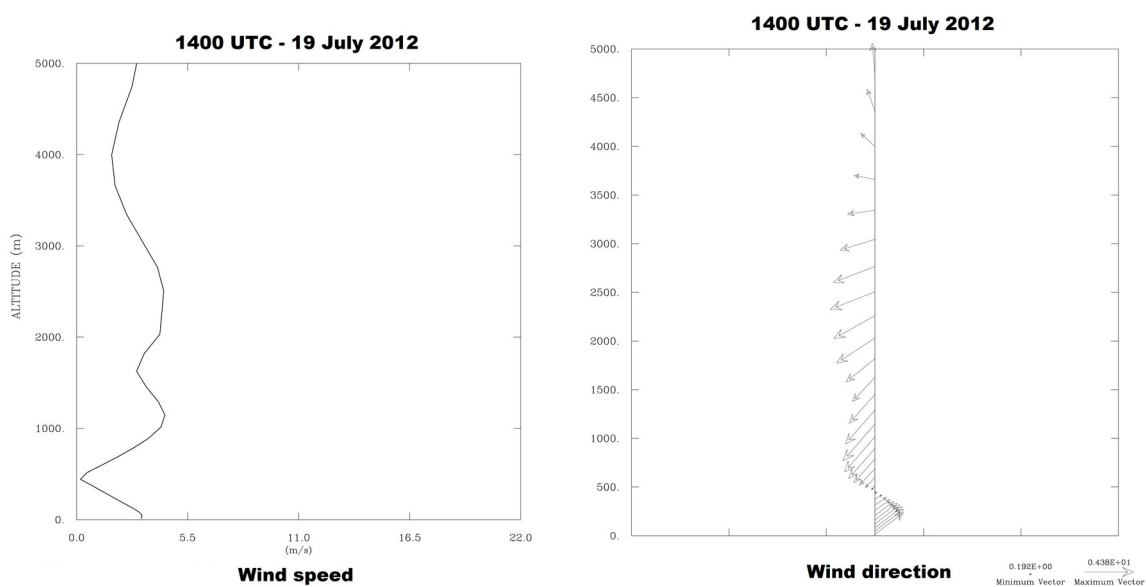

**(b)**

**Figure S1.** Vertical profile of horizontal wind velocity simulated at 500 m resolution and wind direction: (a) 1500 UTC – 18<sup>th</sup> July 2012, (b) 1400 UTC – 19<sup>th</sup> July 2012.
